# Supplementary material for: Diurnal variations of ambient particulate wood burning emissions and their contribution to the concentration of Polycyclic Aromatic Hydrocarbons (PAHs) in Seiffen, Germany
Source: Copernicus journal article supplement (doi:10.5194/acp-11-12697-2011), 2011-12-16
Supplement: Supplementary file 1 [file acp-11-12697-2011-supplement.pdf]

1 **SUPPLEMENTARY INFORMATION FOR:**

2 **Diurnal variations of ambient particulate wood burning**  
3 **emissions and their contribution to the concentration of**  
4 **Polycyclic Aromatic Hydrocarbons (PAHs) in Seiffen,**  
5 **Germany**

6  
7 **L. Poulain<sup>1</sup>, Y. Iinuma<sup>1</sup>, K. Müller<sup>1</sup>, W. Birmili<sup>1</sup>, K. Weinhold<sup>1</sup>, E. Brüggemann<sup>1</sup>, T.**  
8 **Gnauk<sup>1</sup>, A. Hausmann<sup>2</sup>, G. Löschau<sup>2</sup>, A. Wiedensohler<sup>1</sup> and H. Herrmann<sup>1</sup>**

9 [1]{Leibniz-Institut für Troposphärenforschung, Permoserstr. 15, 04318 Leipzig, Germany}

10 [2]{Sächsisches Landesamt für Umwelt, Landwirtschaft und Geologie (LfULG) Pf 54 01 37,  
11 01311 Dresden, Germany}

12 Correspondence to: H. Herrmann ([herrmann@tropos.de](mailto:herrmann@tropos.de))

13

14

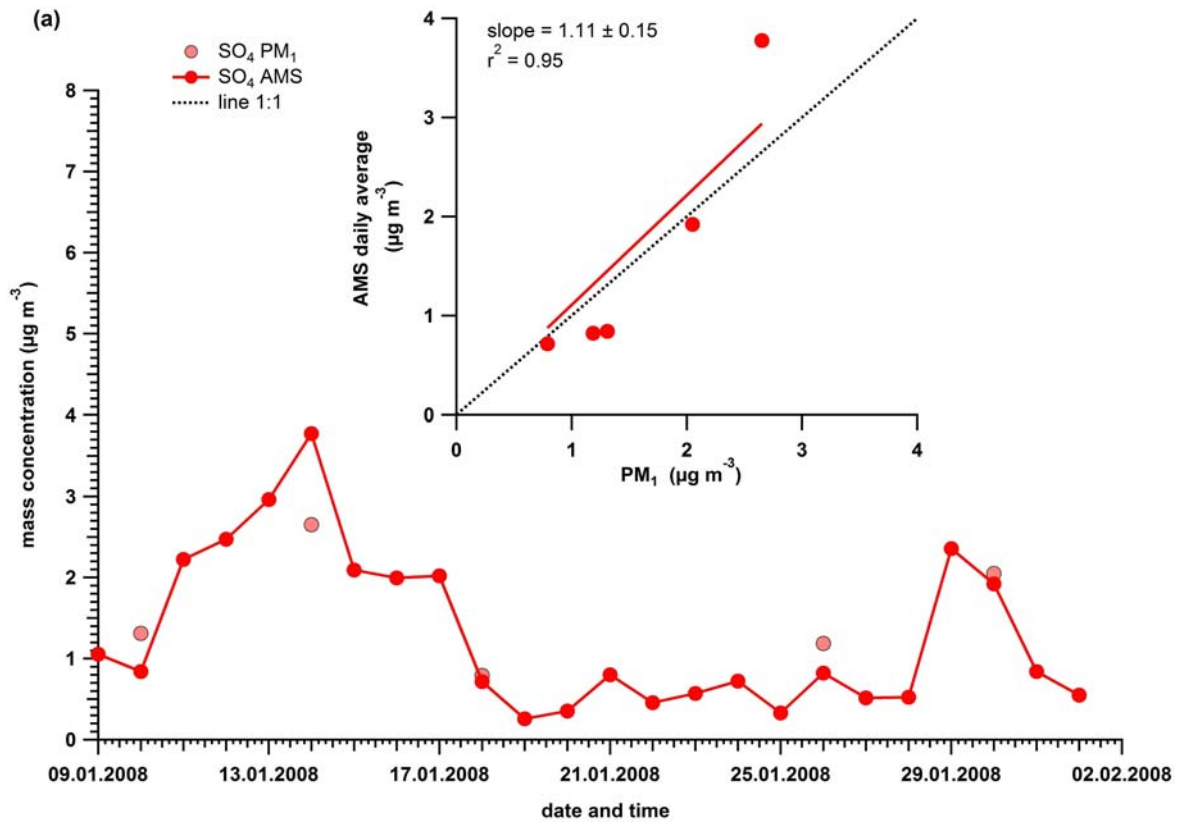

1

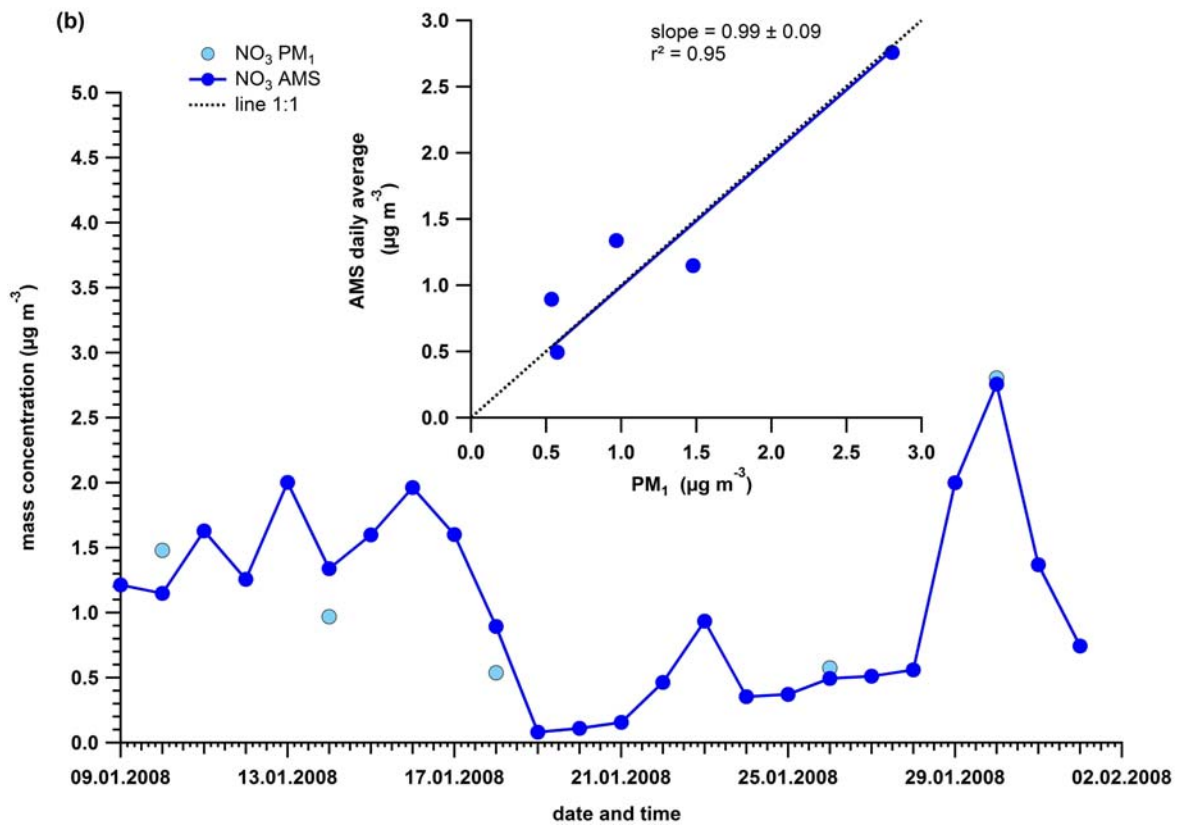

2

3 Figure SI-1. Comparison of the AMS daily average concentration to PM<sub>1</sub> filter samples for  
 4 sulfate (a), nitrate (b) and ammonium (c) assuming an AMS CE of 1.

1  
2

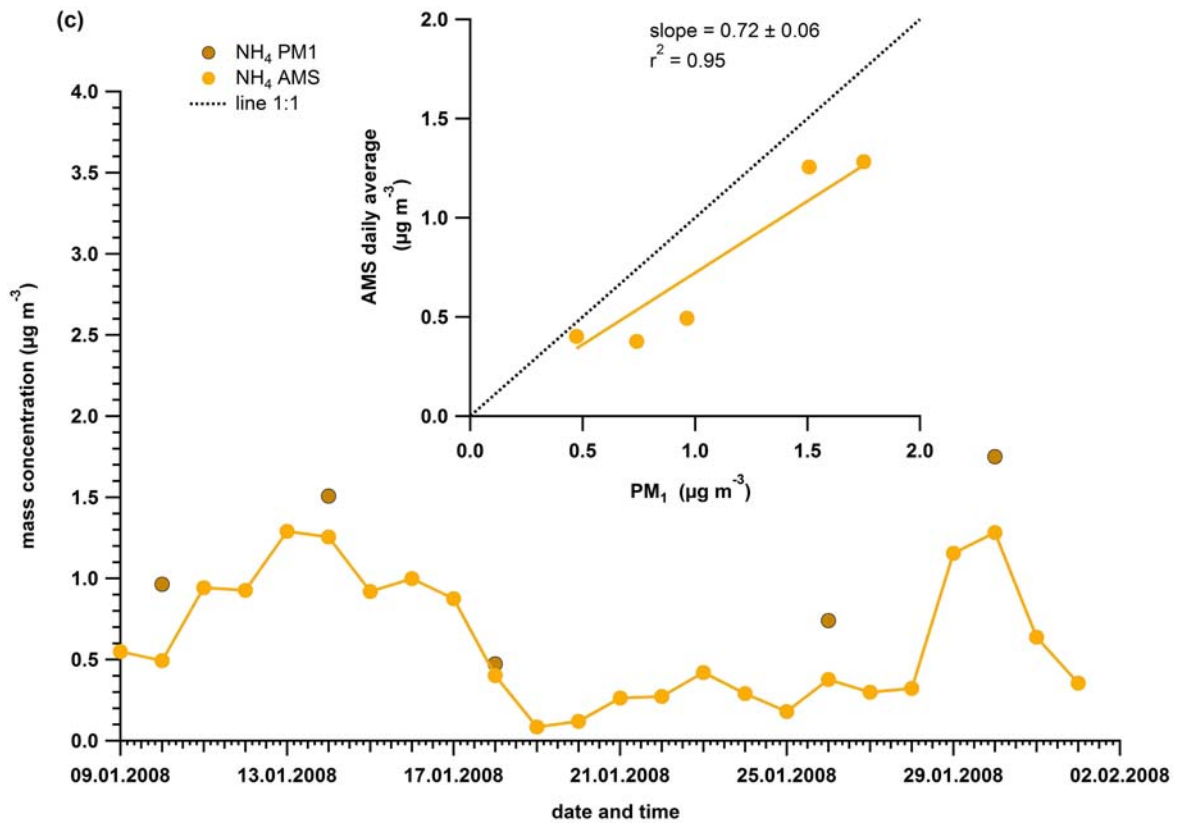

3  
4  
5  
6  
7

Figure SI-1. (continued)

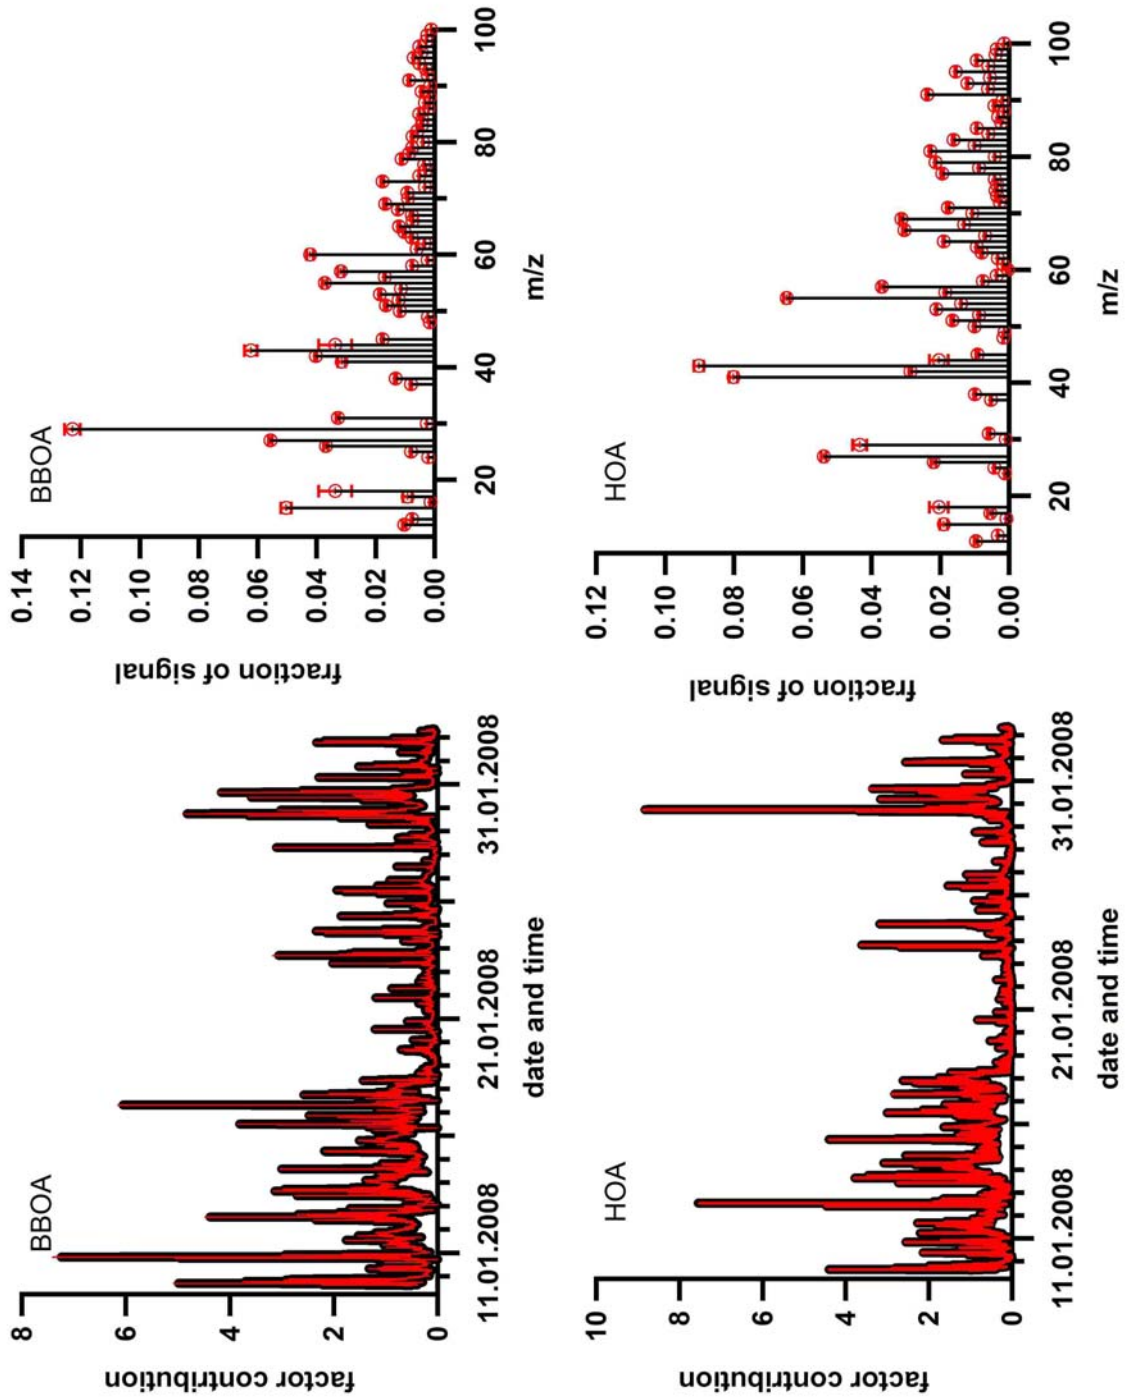

1  
2  
3  
4  
5  
6

Figure SI-2. Results from bootstrapping analysis. Average (black) and standard error (red) on mass spectra and time series are shown for each factor.

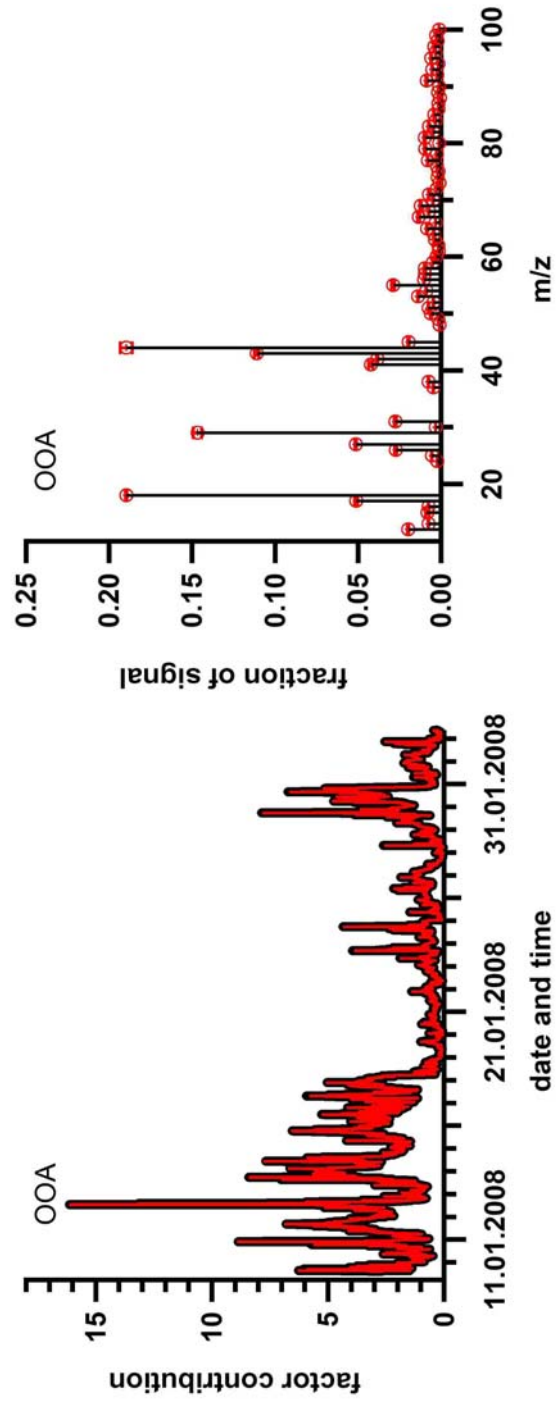

1  
 2 Figure SI-2. (continued)

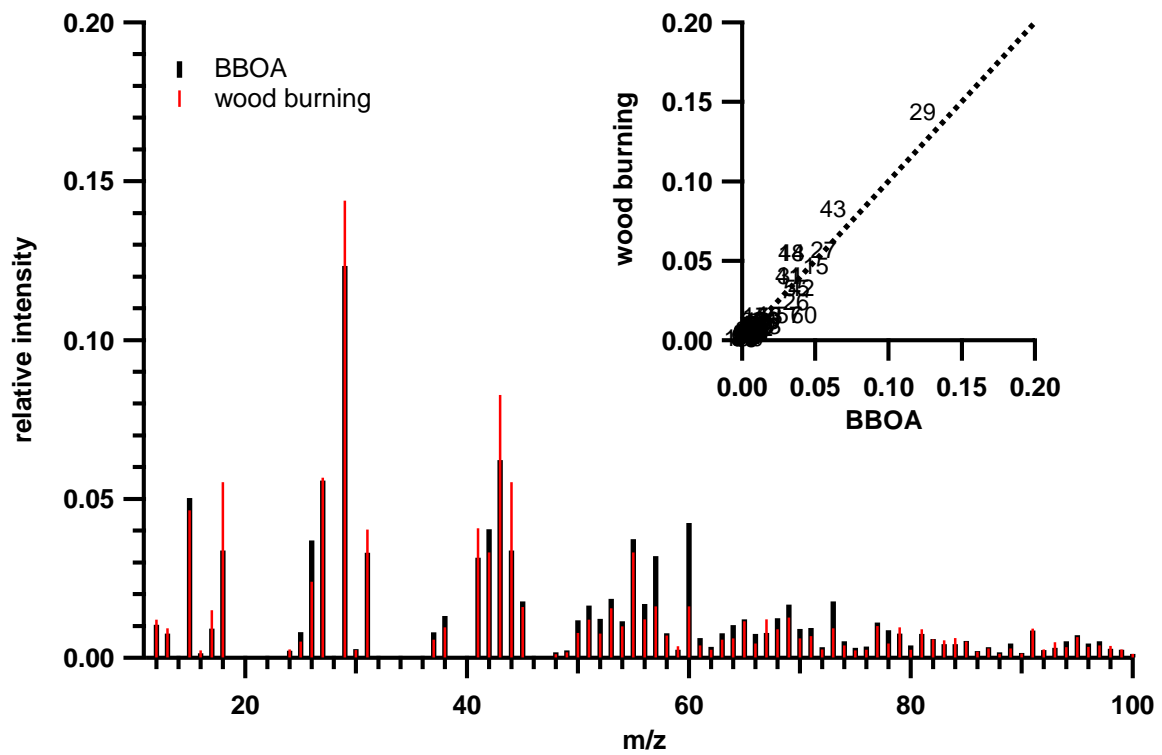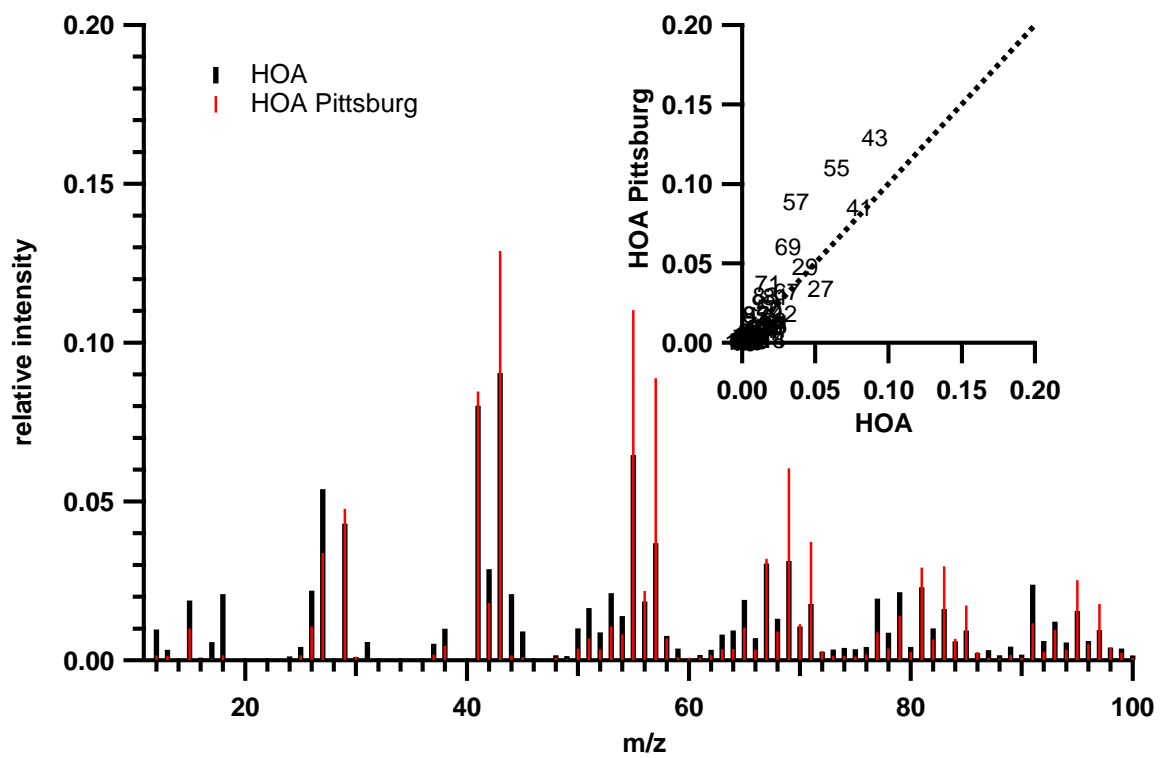

1  
2  
3

Figure SI-3. Factor mass spectra and their reference mass spectra.

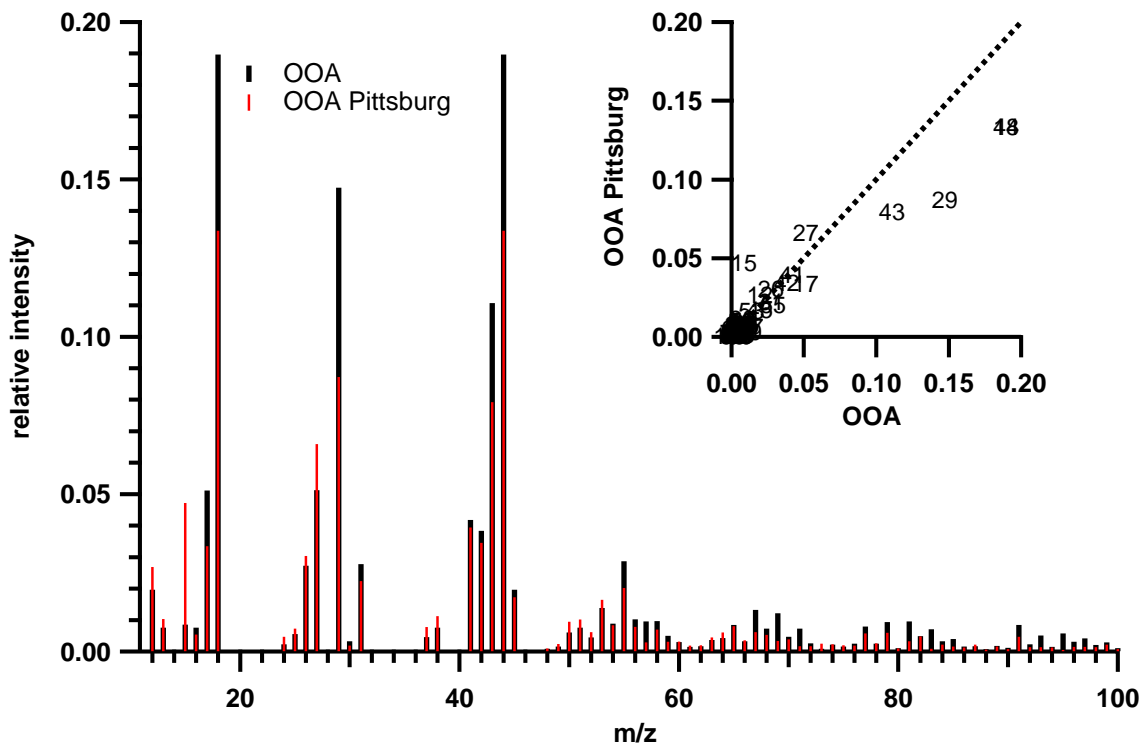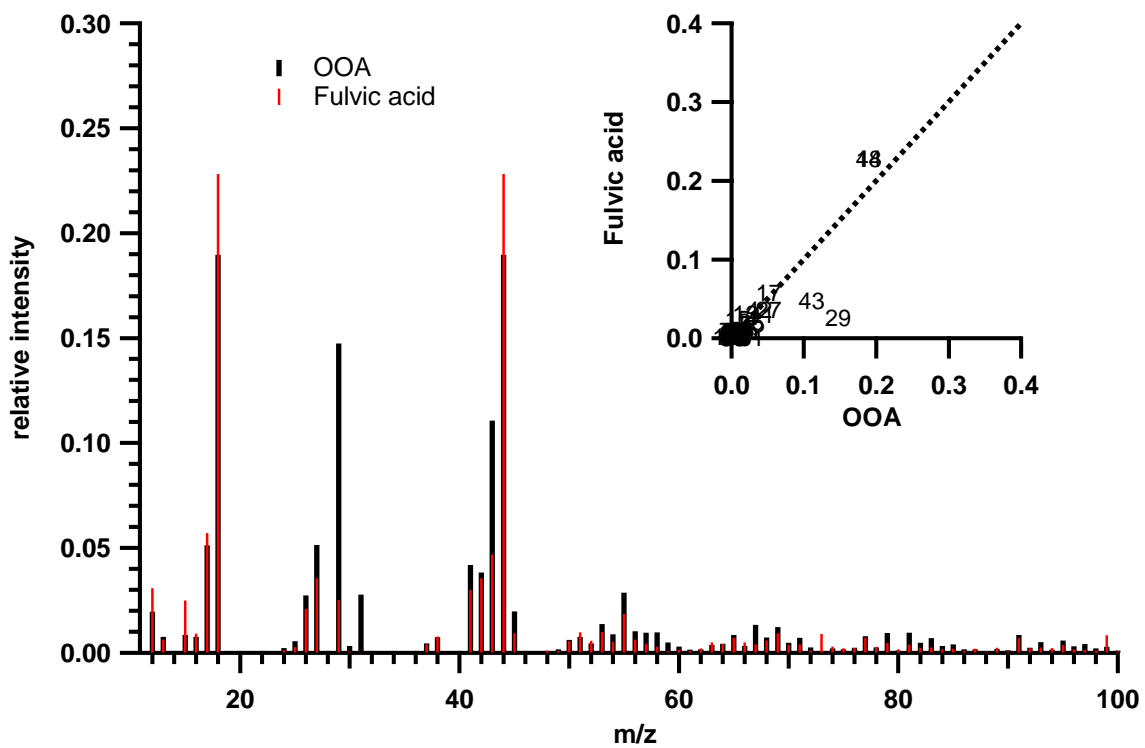

1

2 Figure SI-3. (continued)

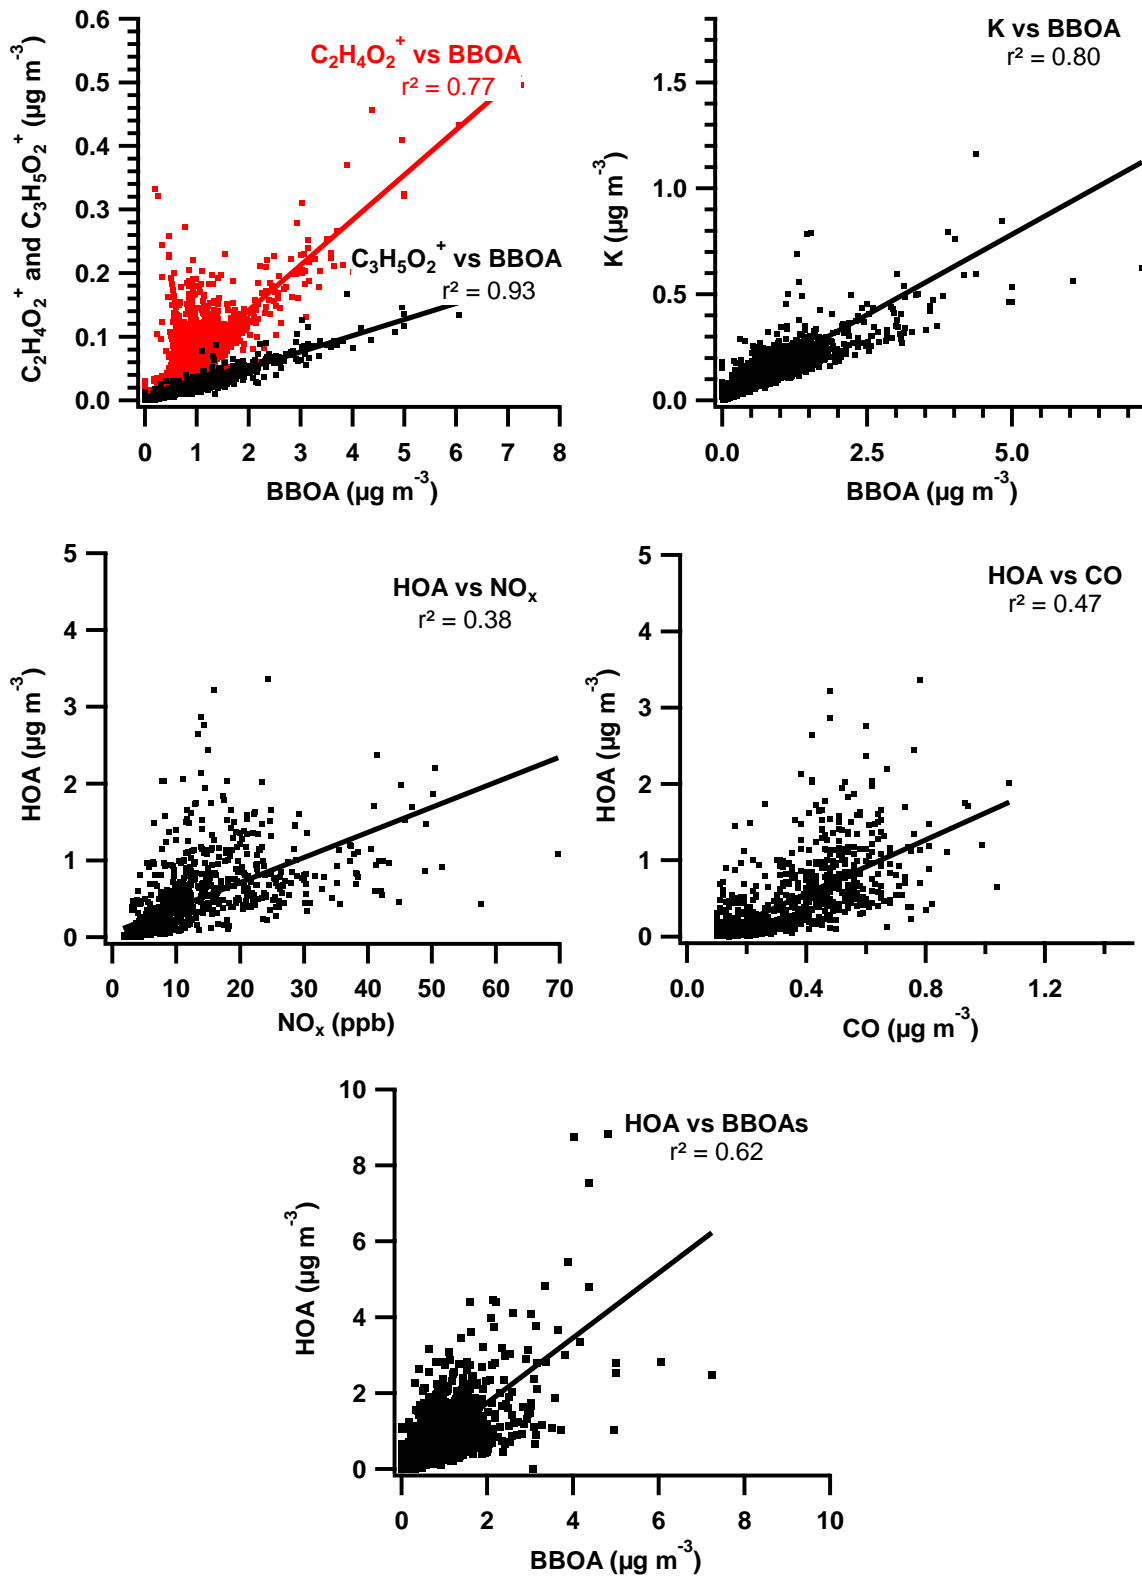

1  
2  
3  
4  
5

Figure SI-4. Correlation plots between PMF factors (BBOA and HOA) and different tracers.



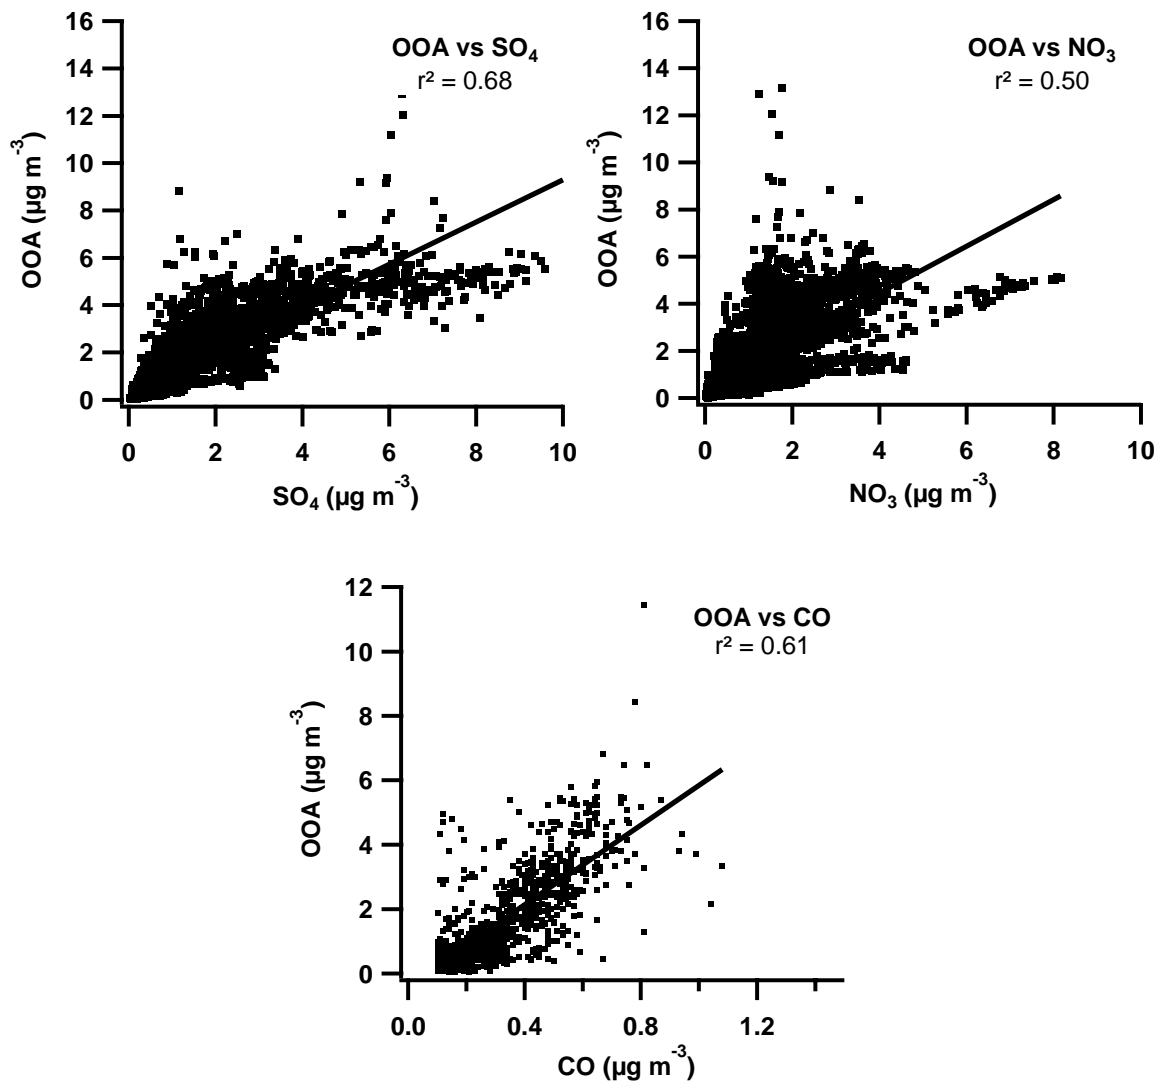

1  
2  
3  
4

Figure SI-5. Correlation plots between PMF factors OOA and different tracers.
